# Supplementary material
Source: MDPI journal article supplement (https://www.mdpi.com/2673-9976/4/1/14)
Supplement: s1 [file s1]

# Isolation and genetic characterization of bacteria associated with *Philaenus spumarius* for the control of *Xylella fastidiosa*

Ana Afonseca\*, Sofia Silva, Cristina Cameirão, and Paula Baptista

Centro de Investigação de Montanha (CIMO), Instituto Politécnico de Bragança,  
Campus de Santa Apolónia, 5300-253 Bragança, Portugal

\* Corresponding author: [anafilipa.afonseca53@gmail.com](mailto:anafilipa.afonseca53@gmail.com)

## Abstract:

The endosymbiotic bacteria that live within the body of insects are involved in many aspects of the host physiology, including reproduction and defense. *Philaenus spumarius* was identified as one of the main vector of *Xylella fastidiosa*, a bacterium responsible for several diseases in a variety of agricultural crops of high importance. In this work, different media types were evaluated for the isolation of bacteria living within *P. spumarius* adults, for their potential exploitation in the management *X. fastidiosa*. Specifically, was compared the effect of minimal (Luria Bertani - LB) and complex (Modified Melin-Norkrans - MMN) media, with and without fetal bovine or gelling agents, on the abundance and diversity of bacteria. The collection of isolates obtained and of others previously obtained was further characterized by BOX-PCR and sequencing of the 16S ribosomal RNA (rRNA) gene.

**Keywords:** Culture media; DNA fingerprinting; BOX-PCR; 16S rRNA gene sequencing

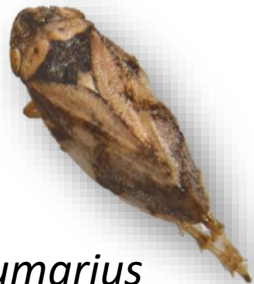

*Philaenus spumarius*

# Material and Methods

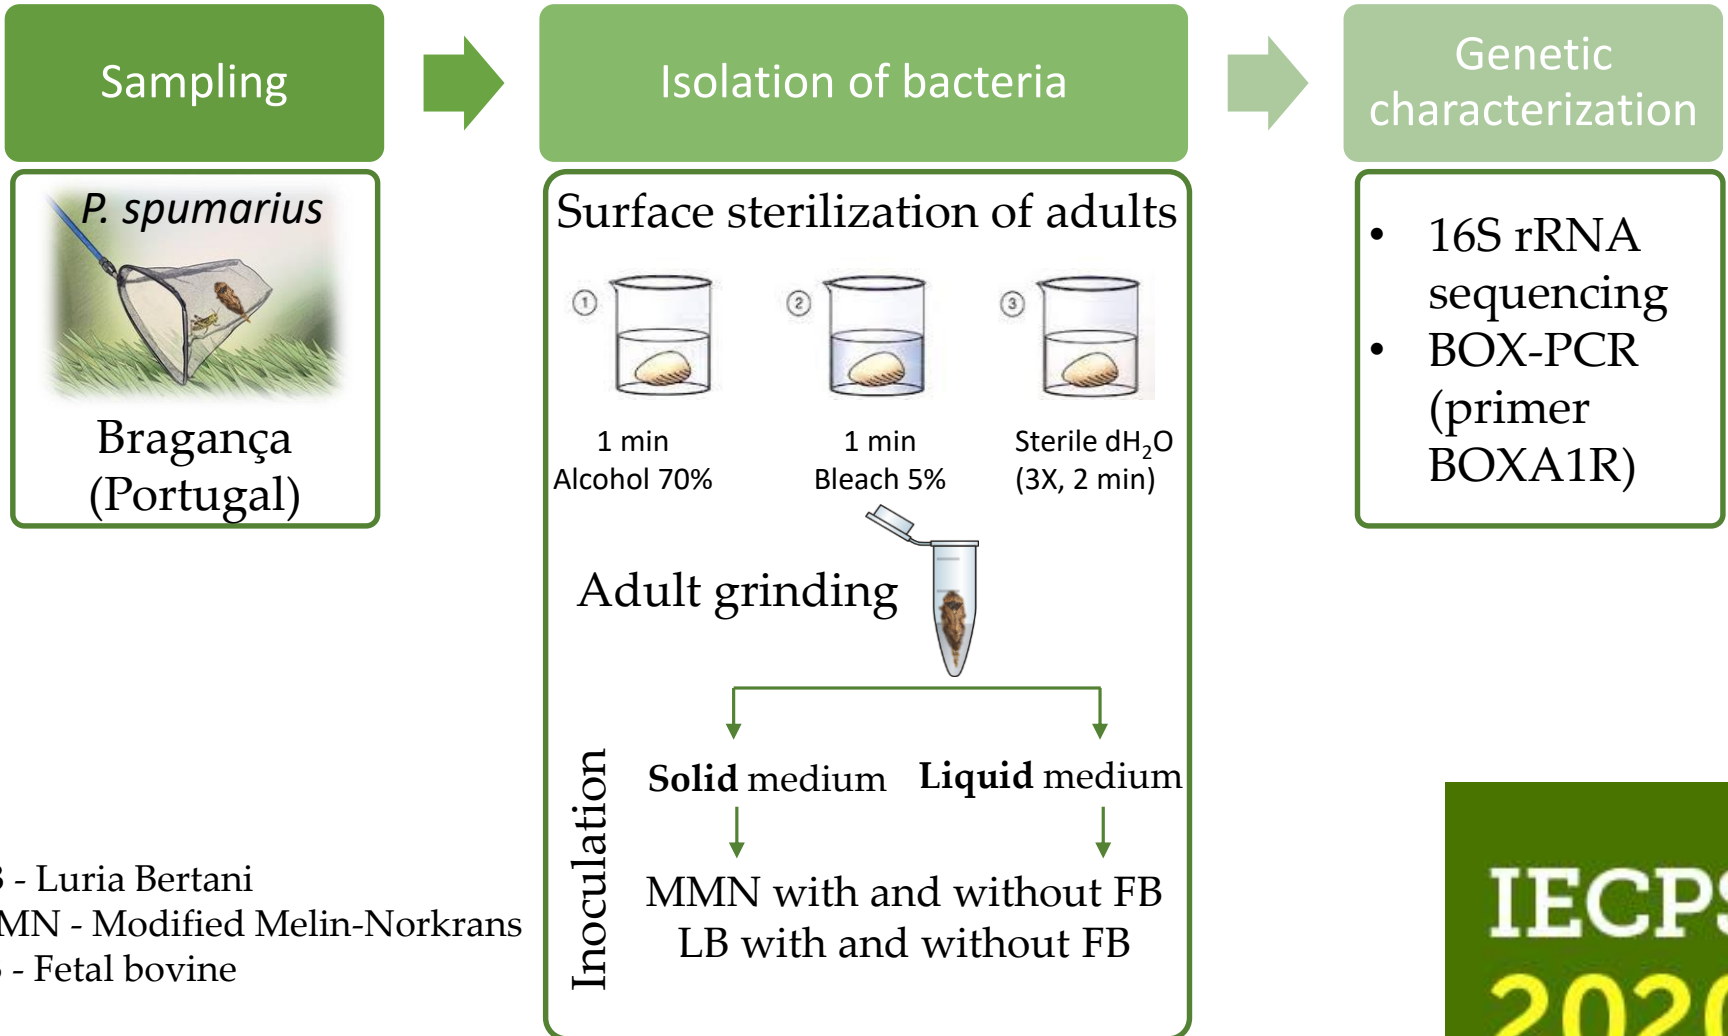

LB - Luria Bertani  
MMN - Modified Melin-Norkrans  
FB - Fetal bovine

# Results and Discussion

## Solid vs. Liquid media

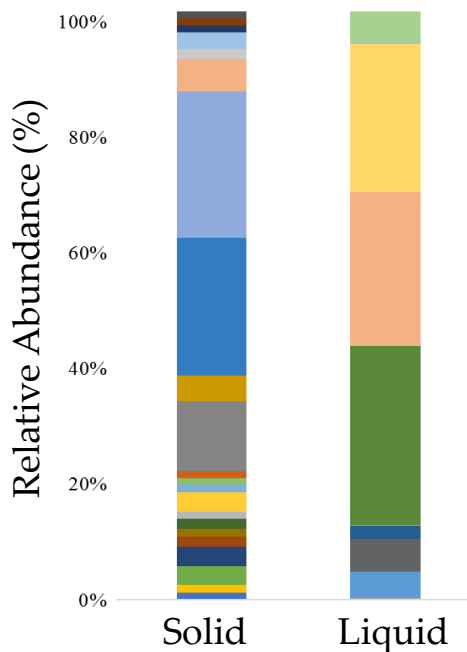

## Type of culture media

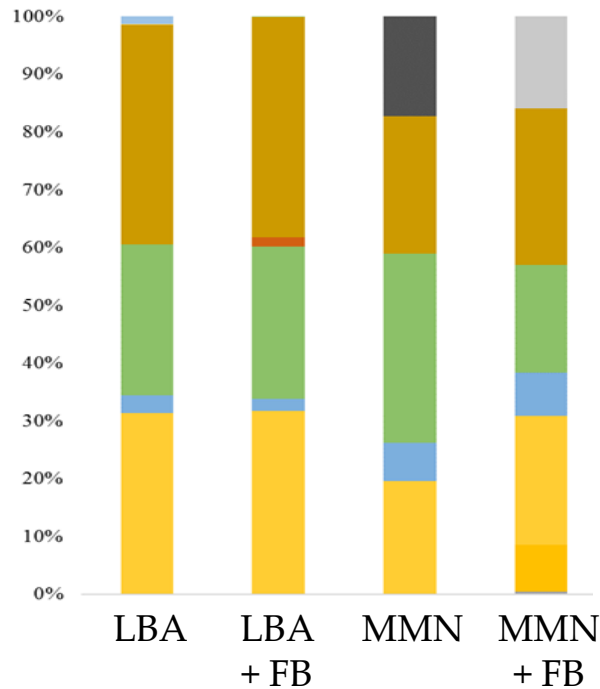

- *Aeromicrobium fastidiosum*
- *Arthrobacter sp. 1*
- *Arthrobacter sp. 2*
- *Bacillus sp. 1*
- *Bacillus sp. 2*
- *Brevundimonas sp. 1*
- *Brevundimonas sp. 2*
- *Caulobacteraceae*
- *Cellulomonas cellasea*
- *Curtobacterium*
- *Devosia*
- *Frigoribacterium sp. 1*
- *Frigoribacterium sp. 2*
- *Massilia aurea*
- *Moraxellaceae*
- *Mycoplasma weryonii*
- *Pigmentiphaga aceris*
- *Pseudomonas marginalis*
- *Pseudomonas sp. 1*
- *Pseudomonas sp. 2*
- *Pseudomonas sp. 3*
- *Rathayibacter*
- *Rathayibacter caricis*
- *Rhizobiaceae 1*
- *Rhizobiaceae 2*
- *Rhizobiaceae 3*
- *Rhizobiales*
- *Rhizobium*
- *Rhodococcus corvnebacterioides*
- *Williamsia sp. 1*
- *Williamsia sp. 2*

- The solid media facilitated the growth of more diverse bacterial taxa

- No differences on the diversity of bacteria among the two media
- The addition of FB leads to a slight increase in bacterial abundance

# Results and Discussion

Genus Species Isolate Class

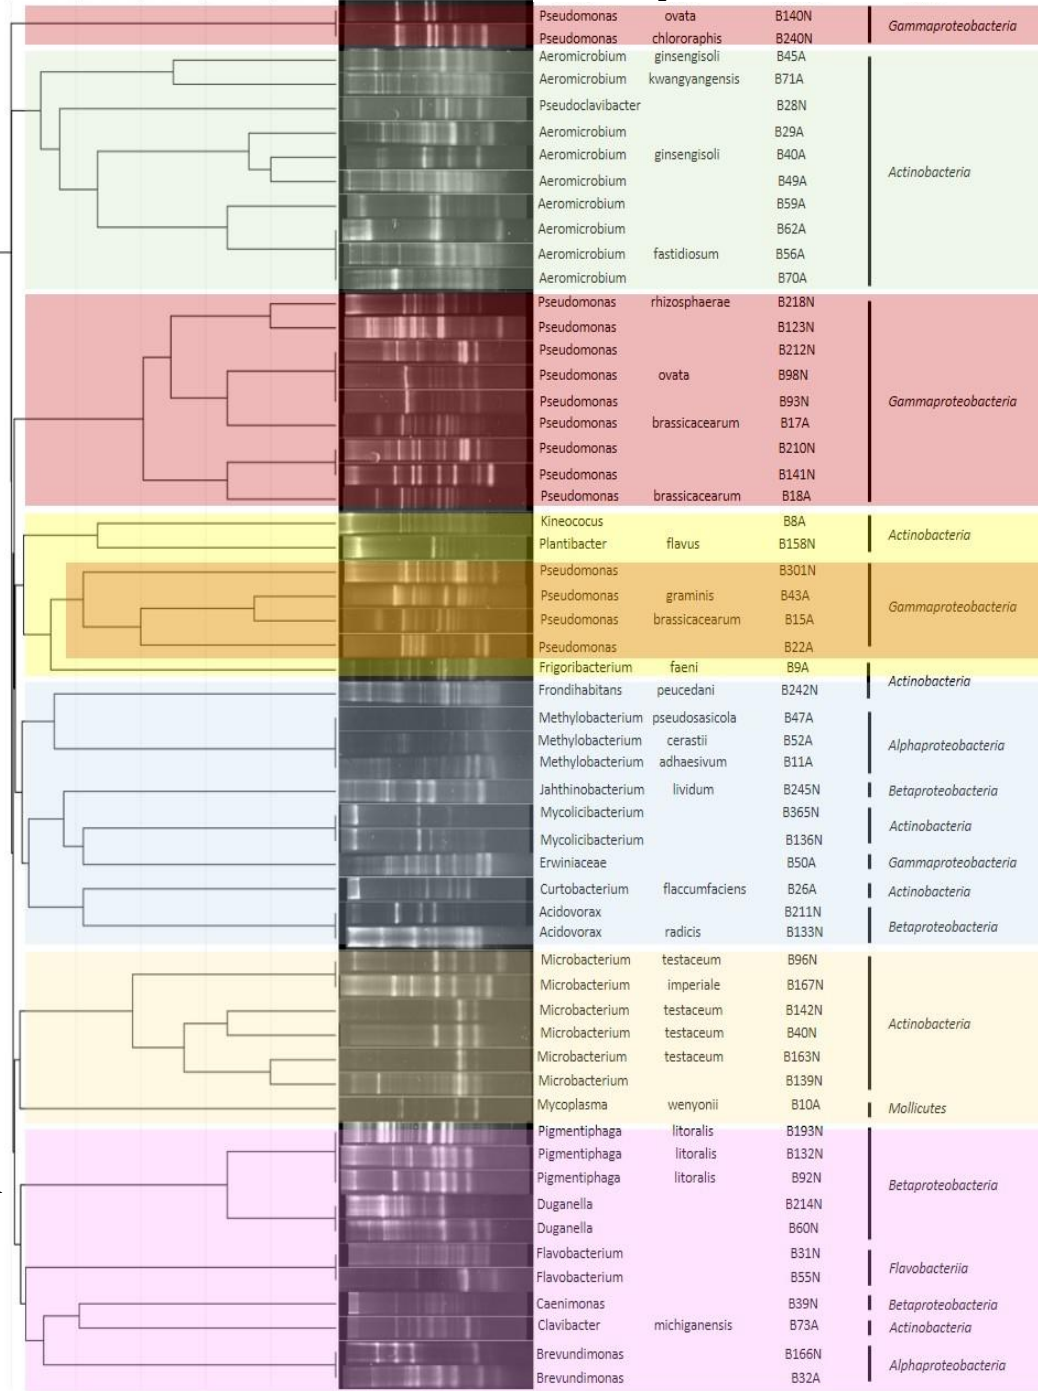

The **BOX-PCR** revealed a high discriminatory power, allowing the differentiation of the bacteria at the intra-species level

IECPS  
2020

Dendrogram BOX-PCR patterns showing the relationship between bacterial isolates (Dice coefficient; UPGMA clustering method).



# Results and Discussion

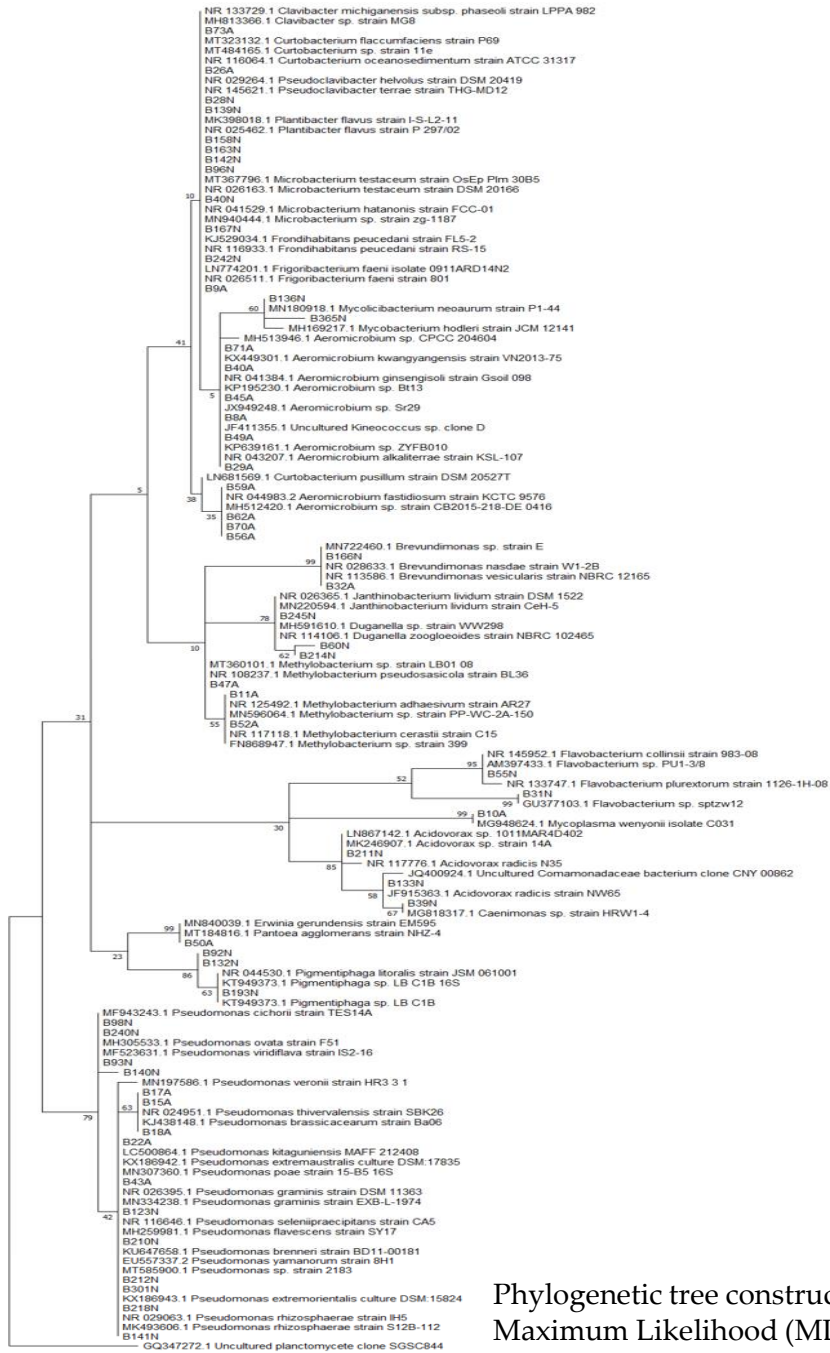

Family

Class

*Microbacteriaceae*

*Mycobacteriaceae*

*Microbacteriaceae*

*Nocardioideae*

*Kineosporiaceae*

*Nocardioideae*

*Microbacteriaceae*

*Nocardioideae*

*Caulobacteraceae*

*Oxalobacteraceae*

*Methylobacteraceae*

*Flavobacteriaceae*

*Mycoplasmataceae*

*Comamonadaceae*

*Erwiniaceae*

*Alicyclogenetaceae*

*Pseudomonadaceae*

*Gammaproteobacteria*

*Alphaproteobacteria*

*Betaproteobacteria*

*Alphaproteobacteria*

*Flavobacteria*

*Mollicutes*

*Betaproteobacteria*

*Betaproteobacteria*

*Gammaproteobacteria*

*Betaproteobacteria*

*Gammaproteobacteria*

16S rRNA gene sequencing method is more suitable in phylogenetic evaluations, generally grouping isolates belonging to the same genus

Phylogenetic tree constructed based on 16S rRNA sequences using the Maximum Likelihood (ML) method. The evolutionary model applied to the analysis was K2 + G + I.

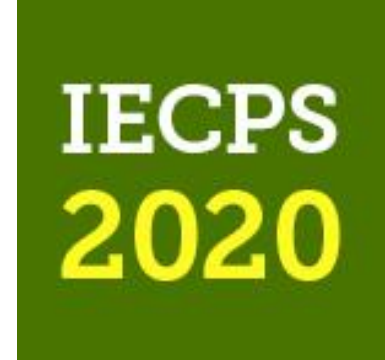

## Conclusions

The exclusive growth of some species in MMN or LB, indicate that both media are complementary

The BOX-PCR has a higher discriminatory power than 16S rRNA gene

Clustering of the isolates using BOX-PCR fingerprinting was different to that obtained from the 16S rRNA gene phylogenetic tree

Futures studies should evaluate the function of these microorganisms in *P. spumarius*.

# Acknowledgments

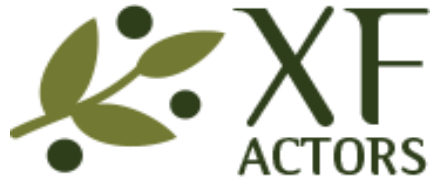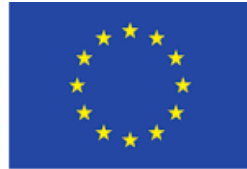

Horizon 2020  
European Union Funding  
for Research & Innovation

This work has received funding from the European Union's Horizon 2020 research and innovation programme under Grant Agreement N. 727987 "*Xylella fastidiosa* Active Containment Through a multidisciplinary-Oriented Research Strategy, XF-ACTORS

IECPS  
2020
